# Supplementary material for: New sensing devices part 1: indole-containing polyamines supported in nanosized boehmite particles
Source: Royal Society of Chemistry journal article supplement (doi:10.1039/b501612f), 2005-01-01
Supplement: b501612f.pdf [file b501612f.pdf]

**Figure S1.** IR spectra of B1NIn, B2NIn, B3NIn and as-prepared boehmite.

**Figure S2.** Calibration curve for the determination of the amount of attached indole in B1NIn, B2NIn and B3NIn.

**Figure S3.** . A and B show Emission Intensity vs. Concentration of  $\text{Cu}^{2+}$  Ions and Fluorescence Emission Intensity vs. pH curves for the system  $\text{Cu}^{2+}$ -**B3NIn**. Figures C and D represent similar plots for the sytem  $\text{Zn}^{2+}$ -**B3NIn**.

**Figure S4.** Fluorescence Emission vs. molar concentration of ATP (A) and Fluorescence Emission Intensity vs. pH (B) curves for the system ATP-**B2NIn**.

**Figure S5.** Fluorescence Emission vs. molar concentration of ADP (A) and Fluorescence Emission Intensity vs. pH (B) curves for the system ADP-**B2NIn**.

**Figure S6.** Fluorescence Emission vs. molar concentration of AMP (A) and Fluorescence Emission Intensity vs. pH (B) curves for the system AMP-**B2NIn**.

**Figure S7.** Fluorescence Emission vs. molar concentration of ATP (A) and Fluorescence Emission Intensity vs. pH (B) curves for the system ATP-**B1NIn**.

**Figure S8.** Fluorescence Emission vs. molar concentration of ADP (A) and Fluorescence Emission Intensity vs. pH (B) curves for the system ADP-**B1NIn**.

**Figure S9.** Fluorescence Emission vs. molar concentration of AMP (A) and Fluorescence Emission Intensity vs. pH (B) curves for the system AMP-**B1NIn**.

**Figure S10.** Stern-Volmer plot for the system ADP-**B2NIn**.

**Figure S11.** Stern-Volmer plot for the system AMP-**B2NIn**.

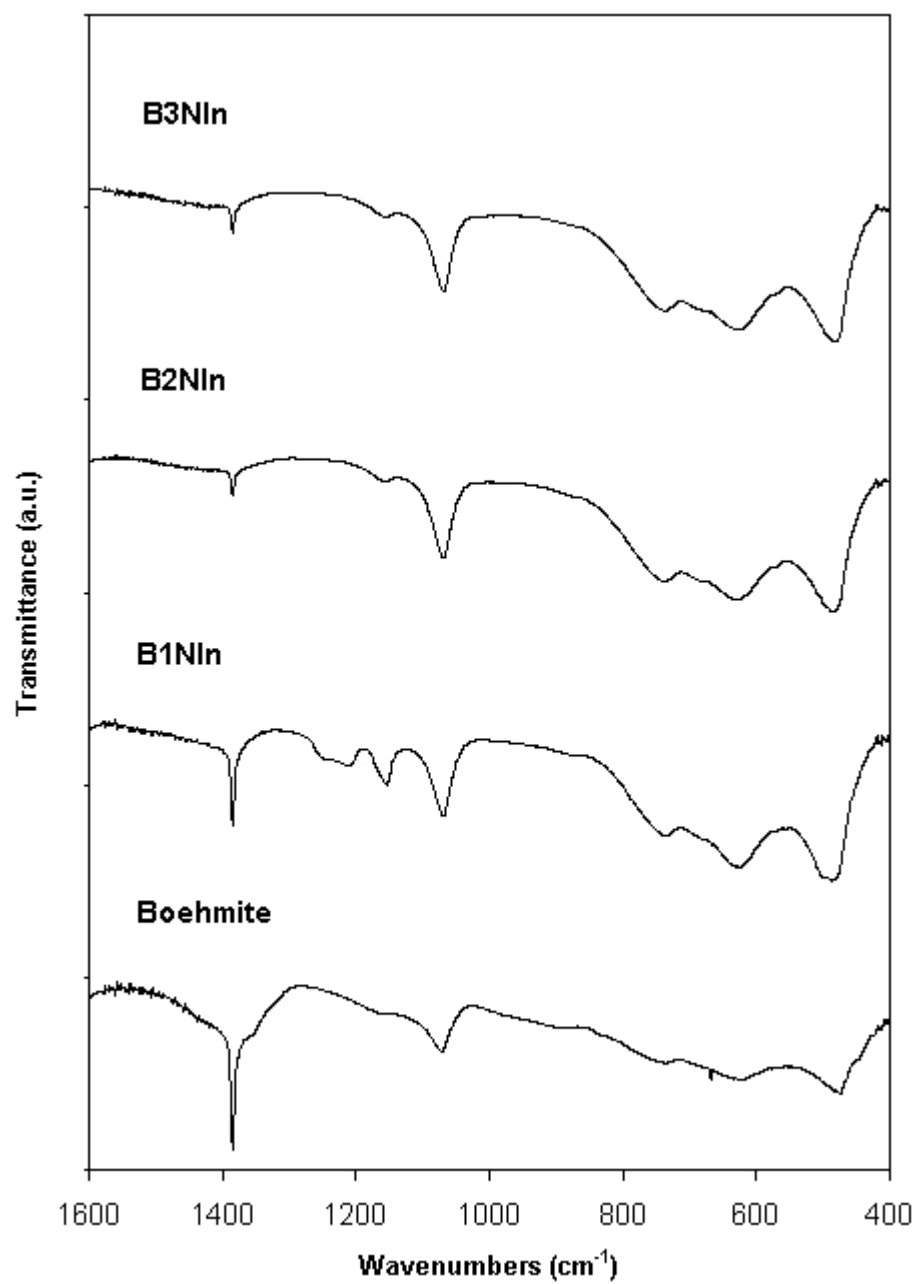

**Figure S1.** IR spectra of B1NIn, B2NIn, B3NIn and as-prepared boehmite.

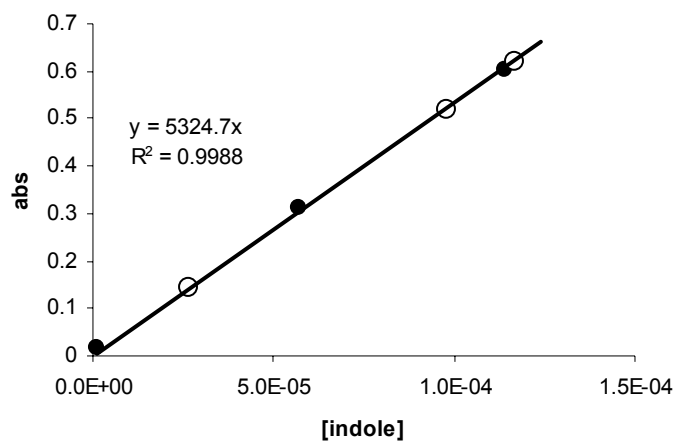

**Figure S2.** Calibration curve for the determination of the amount of attached indole in B1NIn, B2NIn and B3NIn.

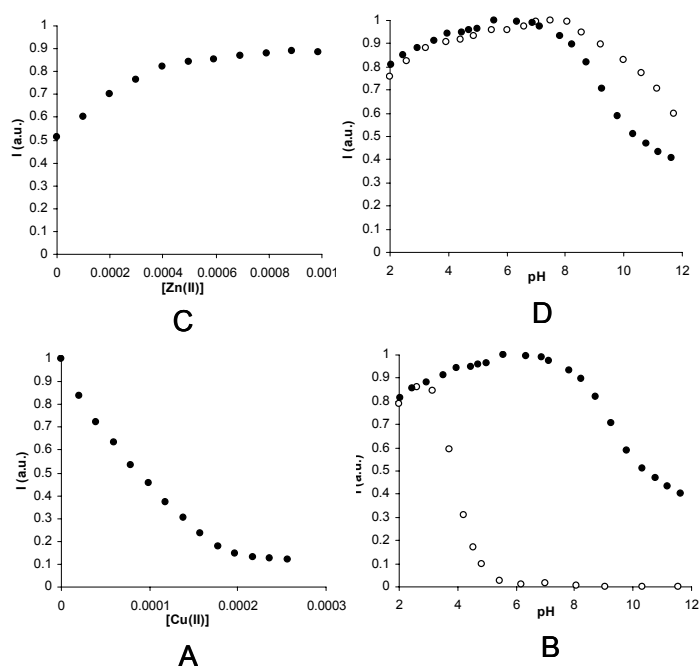

**Figure S3.** A and B show Emission Intensity vs. Concentration of  $\text{Cu}^{2+}$  Ions and Fluorescence Emission Intensity vs. pH curves for the system  $\text{Cu}^{2+}$ -**B3NIn**. Figures C and D represent similar plots for the system  $\text{Zn}^{2+}$ -**B3NIn**.

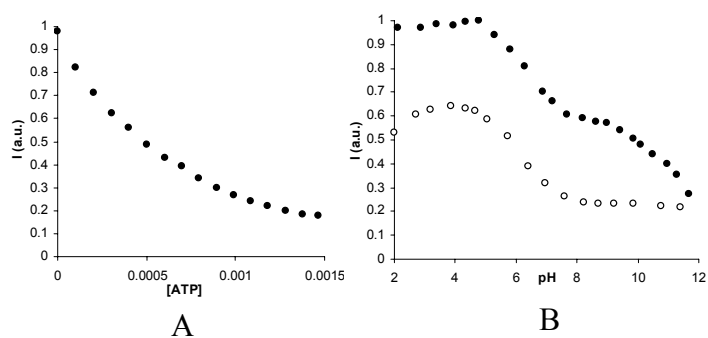

**Figure S4.** Fluorescence Emission vs. molar concentration of ATP (A) and Fluorescence Emission Intensity vs. pH (B) curves for the system ATP-**B2NIn**.

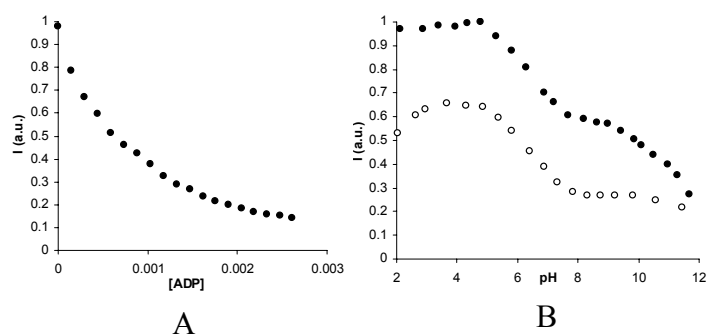

**Figure S5.** Fluorescence Emission vs. molar concentration of ADP (A) and Fluorescence Emission Intensity vs. pH (B) curves for the system ADP-B2NIn.

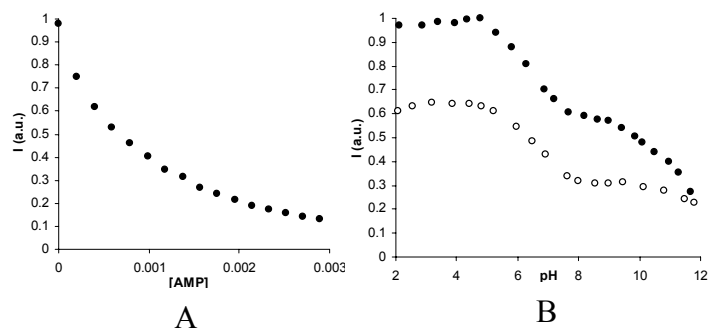

**Figure S6.** Fluorescence Emission vs. molar concentration of AMP (A) and Fluorescence Emission Intensity vs. pH (B) curves for the system AMP-B2NIn.

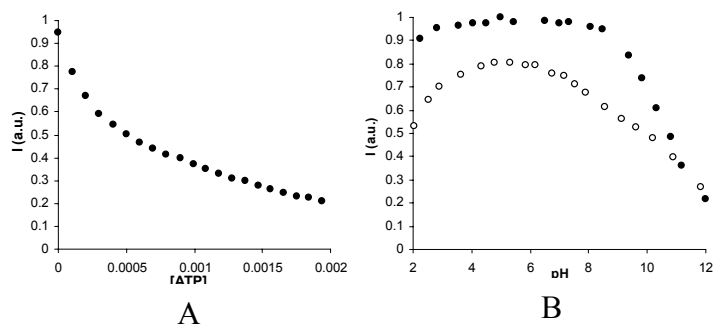

**Figure S7.** Fluorescence Emission vs. molar concentration of ATP (A) and Fluorescence Emission Intensity vs. pH (B) curves for the system ATP-**B1NIn**.



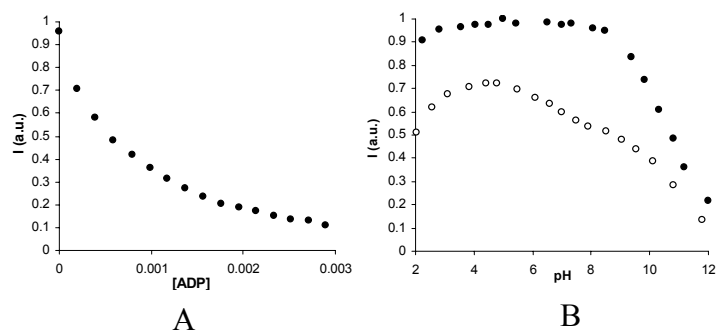

**Figure S8.** Fluorescence Emission vs. molar concentration of ADP (A) and Fluorescence Emission Intensity vs. pH (B) curves for the system ADP-B1NIn.

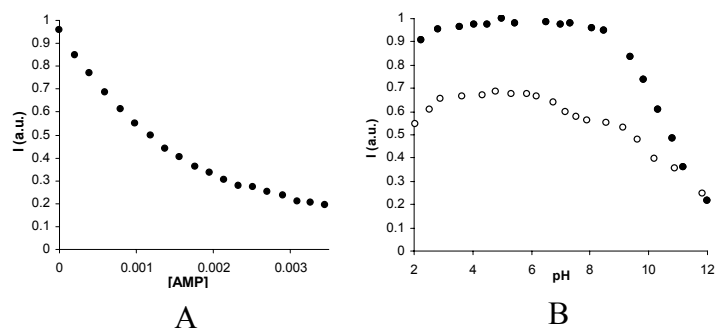

**Figure S9.** Fluorescence Emission vs. molar concentration of AMP (A) and Fluorescence Emission Intensity vs. pH (B) curves for the system AMP-B1NIn.

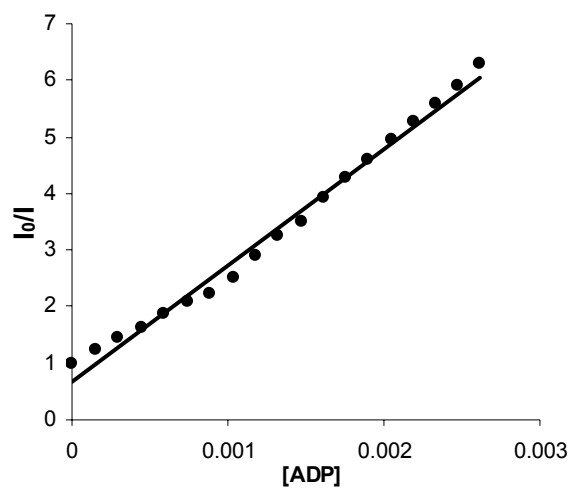

**Figure S10.** Stern-Volmer plot for the system ADP-B2NIn.

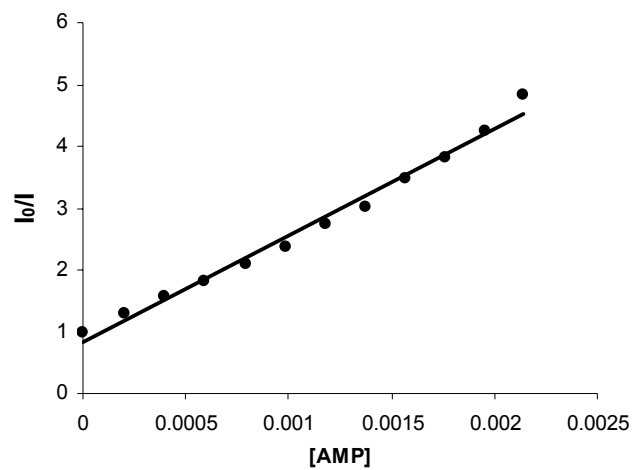

**Figure S11.** Stern-Volmer plot for the system AMP-B2NIn.
